# Supplementary material for: Hierarchically ordered arrays with platinum coated PANI nanowires for highly efficient fuel cell electrodes
Source: Royal Society of Chemistry journal article supplement (doi:10.1039/c7ta02500a), 2017-01-01
Supplement: c7ta02500a1.pdf [file c7ta02500a1.pdf]

## Electronic Supplementary Information

### Hierarchically Ordered Arrays with Platinum Coated PANI Nanowires for Highly Efficient Fuel Cell Electrode

Ruili Sun,<sup>ab</sup> Zhangxun Xia,<sup>a</sup> Lei Shang,<sup>ab</sup> Xudong Fu,<sup>a</sup> Huanqiao Li,<sup>a</sup> Suli Wang,<sup>\*a</sup> and Gongquan Sun<sup>\*a</sup>

#### Experimental section

We could obtain the growth density of PANI nanowires by the following method. In detail, we chose five regions in the SEM figures with low magnification. The area of five regions was  $1 \times 1 \mu\text{m}^2$ . Then, the growth density could be obtained through figuring the amount of PANI nanowires in five regions and averaging.

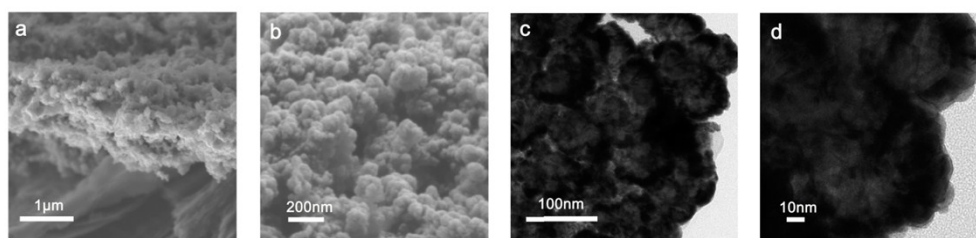

Fig.S1 SEM and TEM images of the disordered clusters structure of Pt-GDL electrode. (a, b) SEM images of side view of Pt-GDL electrode. (c, d) TEM images of Pt clusters on carbon powder.

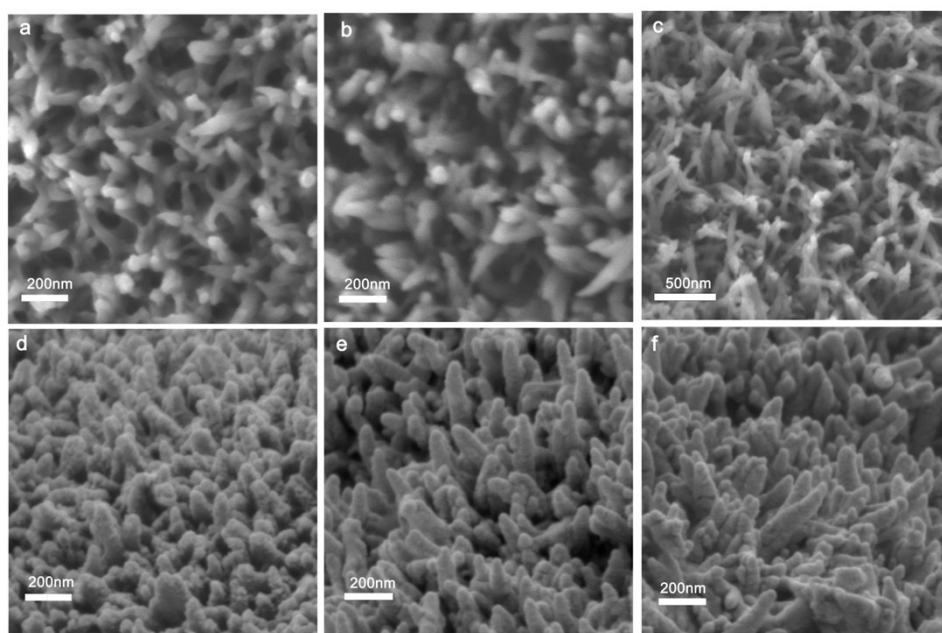

Fig.S2 SEM images of PANI-GDL electrodes (a, b, c) and Pt-PANI-GDL electrodes (d, e, f).  
PANI nanowires was polymerized at 270 K (a, d), 277 K (b, e) and 297 K (c, f).

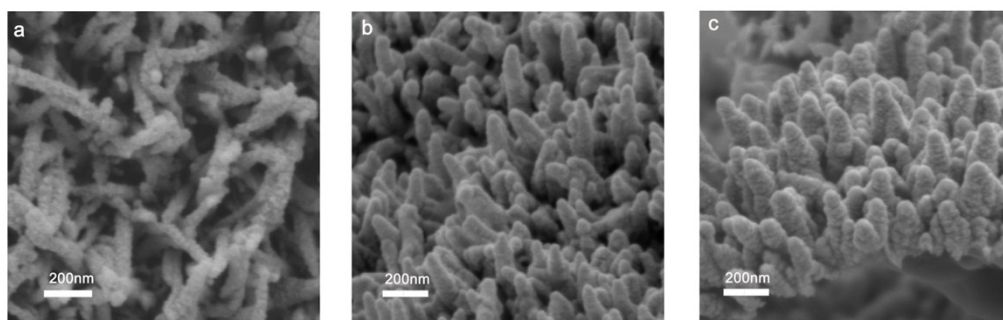

Fig.S3 SEM images of Pt-PANI-GDL electrodes with different sputtering time. (a) 1 min, (b) 5 min, (c) 10 min.

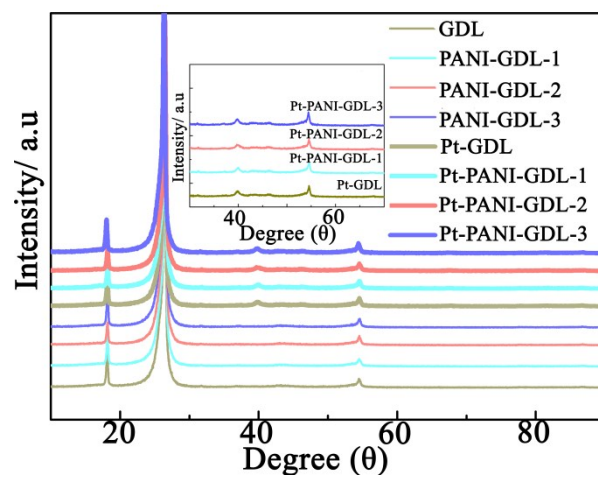

Fig.S4 XRD patterns of Pt-GDL electrode and Pt-PANI-GDL electrodes with different PANI nanowires under the same sputtering time.

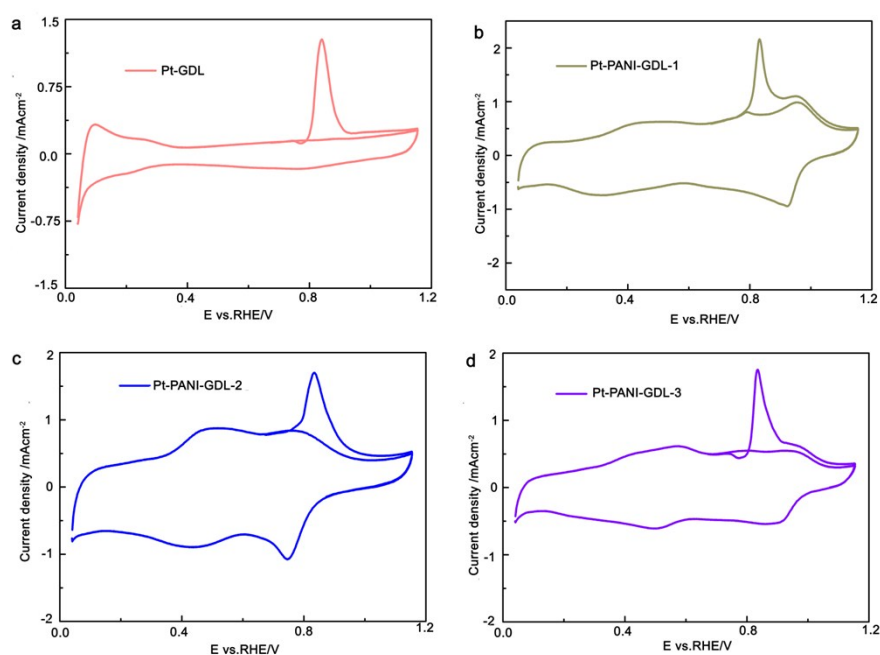

Fig.S5 CO stripping curves of Pt -GDL electrode and Pt-PANI-GDL electrodes. CO stripping measure was conducted in CO saturated  $\text{HClO}_4$  electrolyte (0.1 M) at 0.1 V vs. RHE kept 20 min, and then in  $\text{N}_2$  saturated  $\text{HClO}_4$  electrolyte (0.1 M) with the same potential kept 60 min, and thus cyclic voltammetry (CV) at a scan rate of  $20 \text{ mV s}^{-1}$  was performed

Table 1 Electrochemical properties of different electrodes.

| electrochemical properties | ECSA ( $\text{m}^2/\text{g}_{\text{Pt}}$ ) | MA ( $\text{mA}/\text{mg}_{\text{Pt}}$ ) | SA ( $\text{mA}/\text{cm}^2_{\text{Pt}}$ ) |
|----------------------------|--------------------------------------------|------------------------------------------|--------------------------------------------|
| Pt-PANI-GDL-3              | 13.853                                     | 14.695                                   | 0.108                                      |
| Pt-GDL                     | 11.818                                     | 11.133                                   | 0.0942                                     |
| Pt-C (JM)                  | 45.225                                     | 15.340                                   | 0.0339                                     |

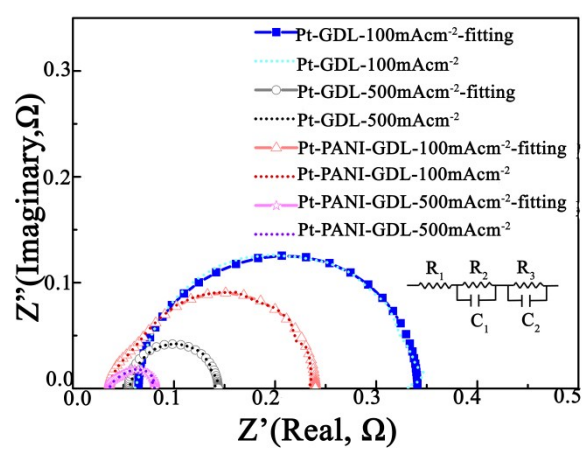

Fig.S6 EIS curves of PEMFC single cells with Pt-PANI-GDL-3 and Pt-GDL electrode at different current density.

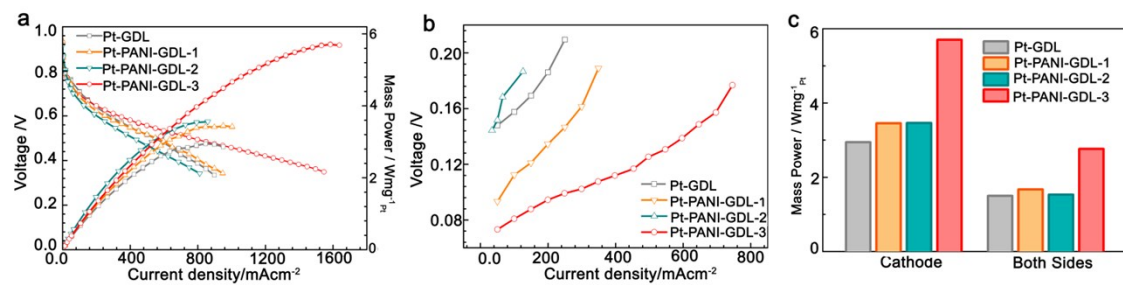

Fig.S7 Performances of PEMFC single cells for Pt-PANI-GDL electrodes with different orderliness.
